# Supplementary material for: Machine Learning Techniques for Chemical Identification Using Cyclic Square Wave Voltammetry
Source: PubMed Central journal article supplement (PMC6567068; doi:10.3390/s19102392), 2019-05-25
Supplement: sensors-19-02392-s001.pdf [file sensors-19-02392-s001.pdf]

Machine learning techniques for chemical identification  
using cyclic square wave voltammetry

Scott N. Dean, Lisa C. Shriver-Lake, Dave A. Stenger, Jeffrey S. Erickson,  
Joel P. Golden, and Scott A. Trammell\*

Supporting information

|        |     | LSTM | FCN | LSTM-FCN | ALSTM-FCN |
|--------|-----|------|-----|----------|-----------|
| 11-SW  | BS  | 128  | 4   | 4        | 8         |
|        | LCN | 128  | NA  | 4        | 8         |
| 4-SW   | BS  | 128  | 4   | 8        | 16        |
|        | LCN | 128  | NA  | 128      | 128       |
| 11-EXP | BS  | 128  | 4   | 4        | 4         |
|        | LCN | 128  | NA  | 4        | 16        |
| 3-EXP  | BS  | 128  | 4   | 16       | 4         |
|        | LCN | 128  | NA  | 16       | 16        |

**Table S1.** LSTM cell number and batch size parameters for neural networks in the study. Both the optimal LSTM cell number (LCN) and batch size (BS) were determined following repeated training-test split cross validation.

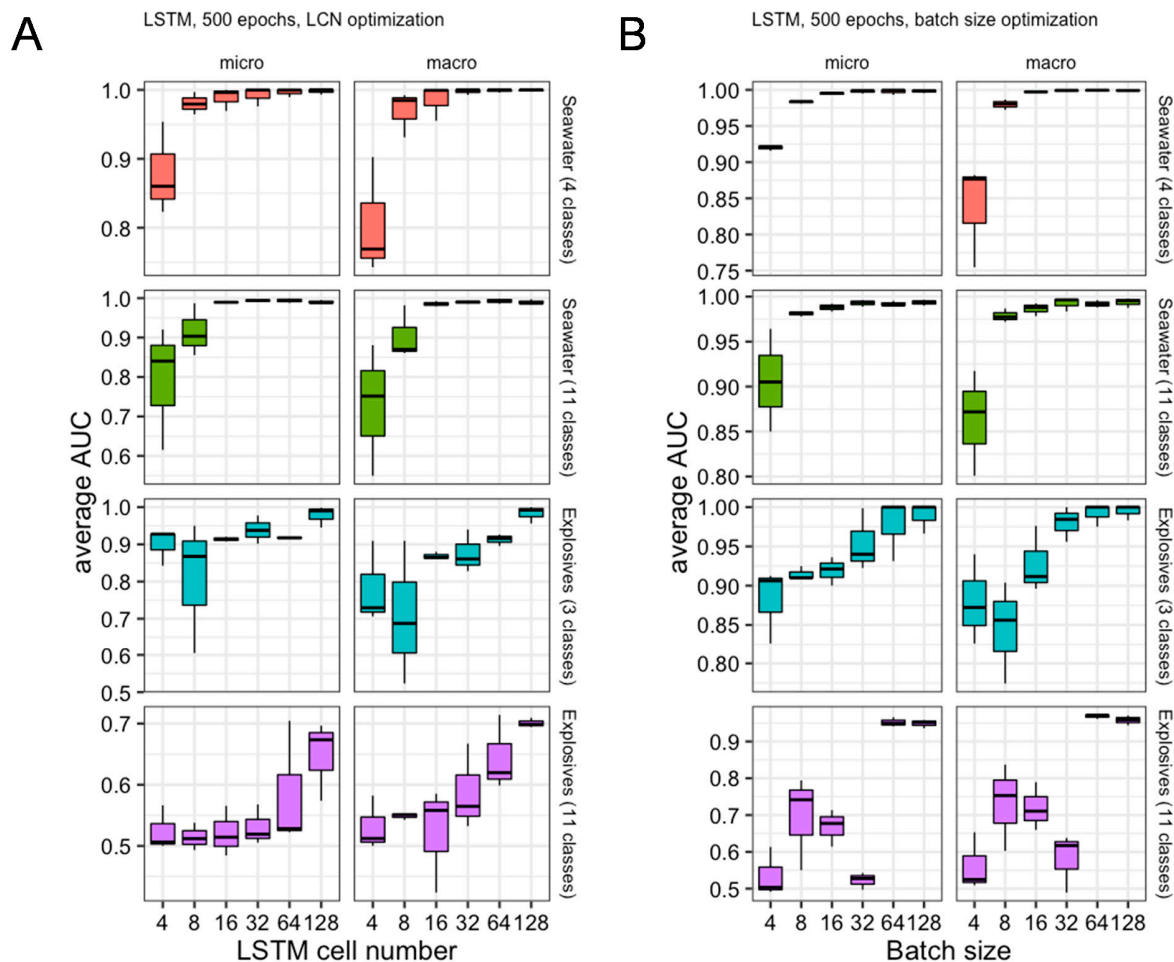

**Figure S1.** Batch size and LSTM cell number optimization for LSTM. (A) Differing batch sizes were tested using LSTM over 500 epochs. Micro- and macro-average ROCAUCs after repeated training-test splits were plotted. (B) Differing LSTM cell number were tested using LSTM over 500 epochs. Micro- and macro-average ROCAUCs after repeated training-test splits were plotted.

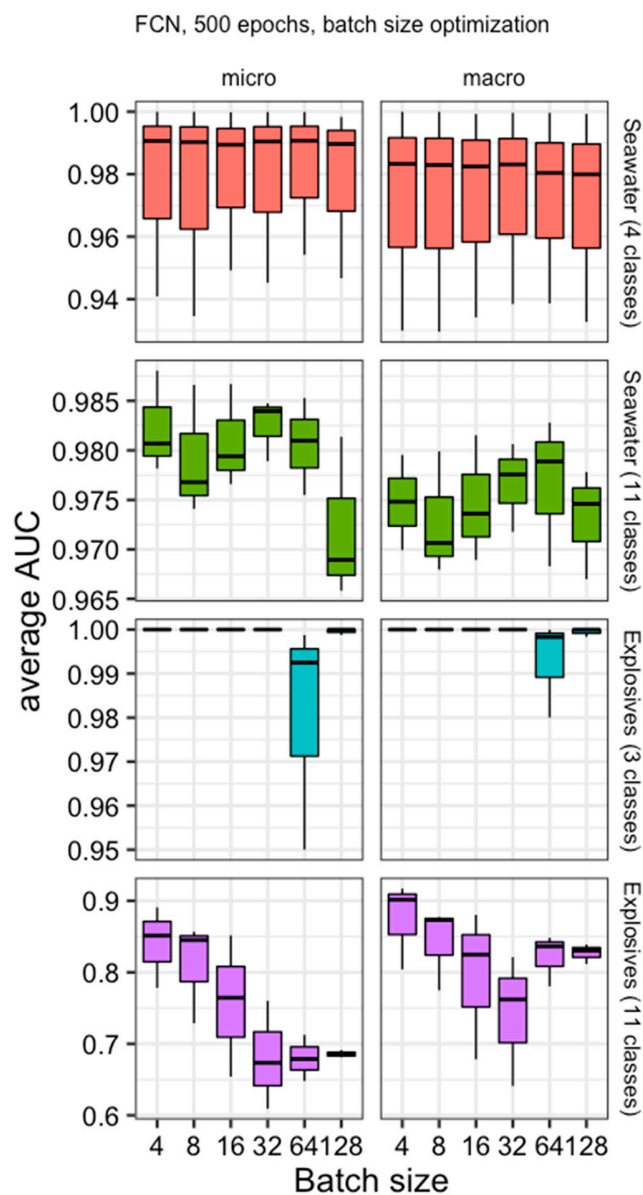

**Figure S2.** Batch size for FCN. Differing batch sizes were tested using FCN over 500 epochs. Micro- and macro-average ROCAUCs after repeated training-test splits were plotted.

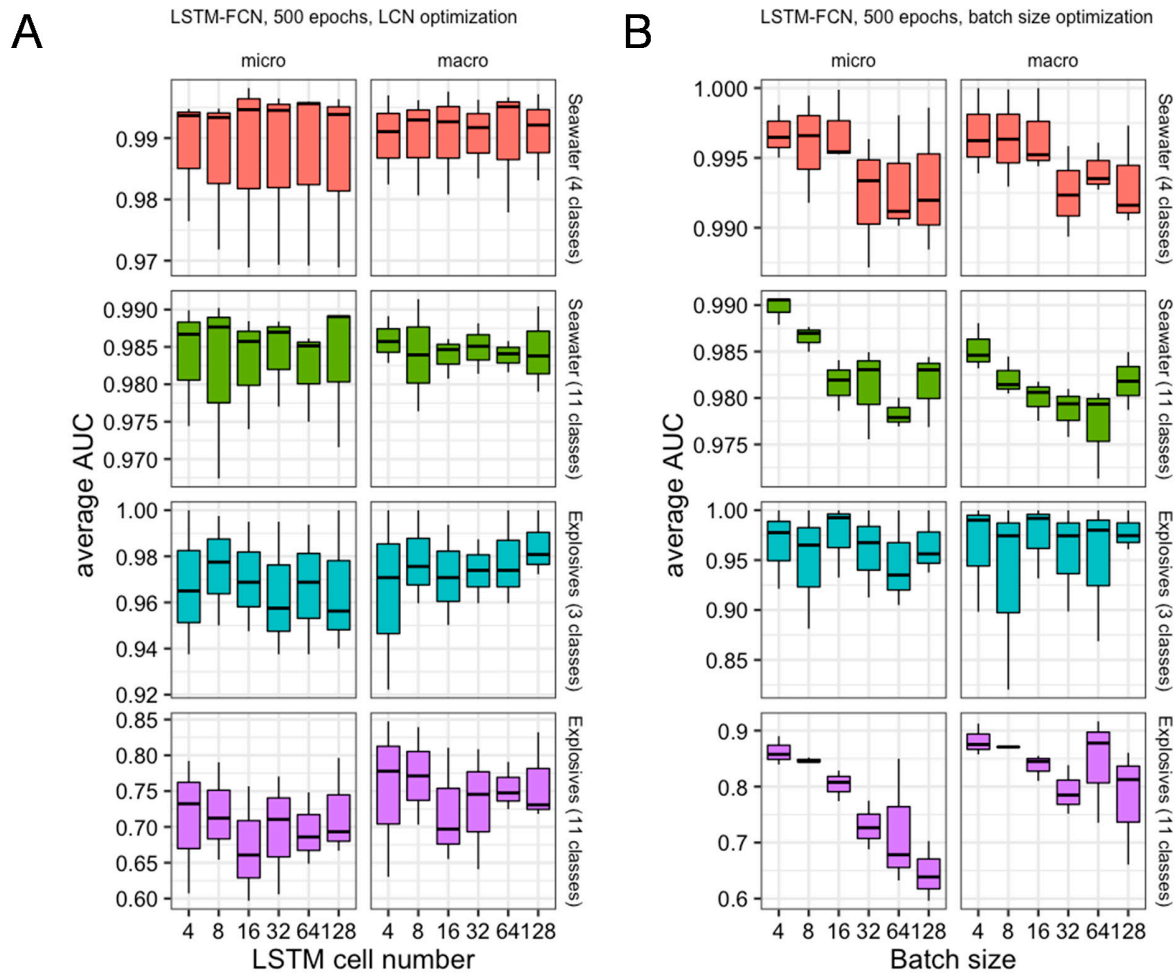

**Figure S3.** Batch size and LSTM cell number optimization for LSTM-FCN. (A) Differing batch sizes were tested using LSTM-FCN over 500 epochs. Micro- and macro-average ROCAUCs after repeated training-test splits were plotted. (B) Differing LSTM cell number were tested using LSTM-FCN over 500 epochs. Micro- and macro-average ROCAUCs after repeated training-test splits were plotted.

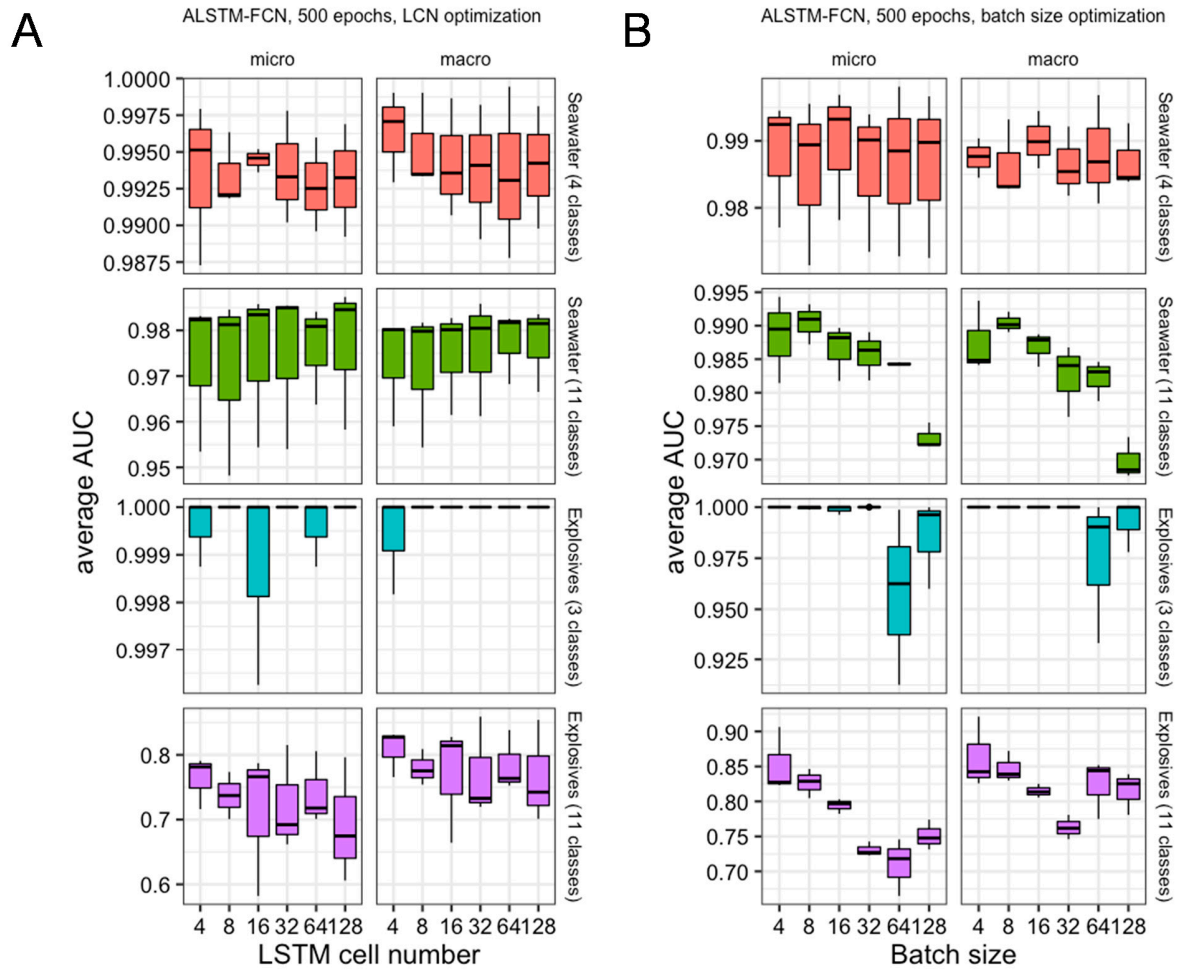

**Figure S4.** Batch size and LSTM cell number optimization for ALSTM-FCN. (A) Differing batch sizes were tested using ALSTM-FCN over 500 epochs. Micro- and macro-average ROCAUCs after repeated training-test splits were plotted. (B) Differing LSTM cell number were tested using ALSTM-FCN over 500 epochs. Micro- and macro-average ROCAUCs after repeated training-test splits were plotted.

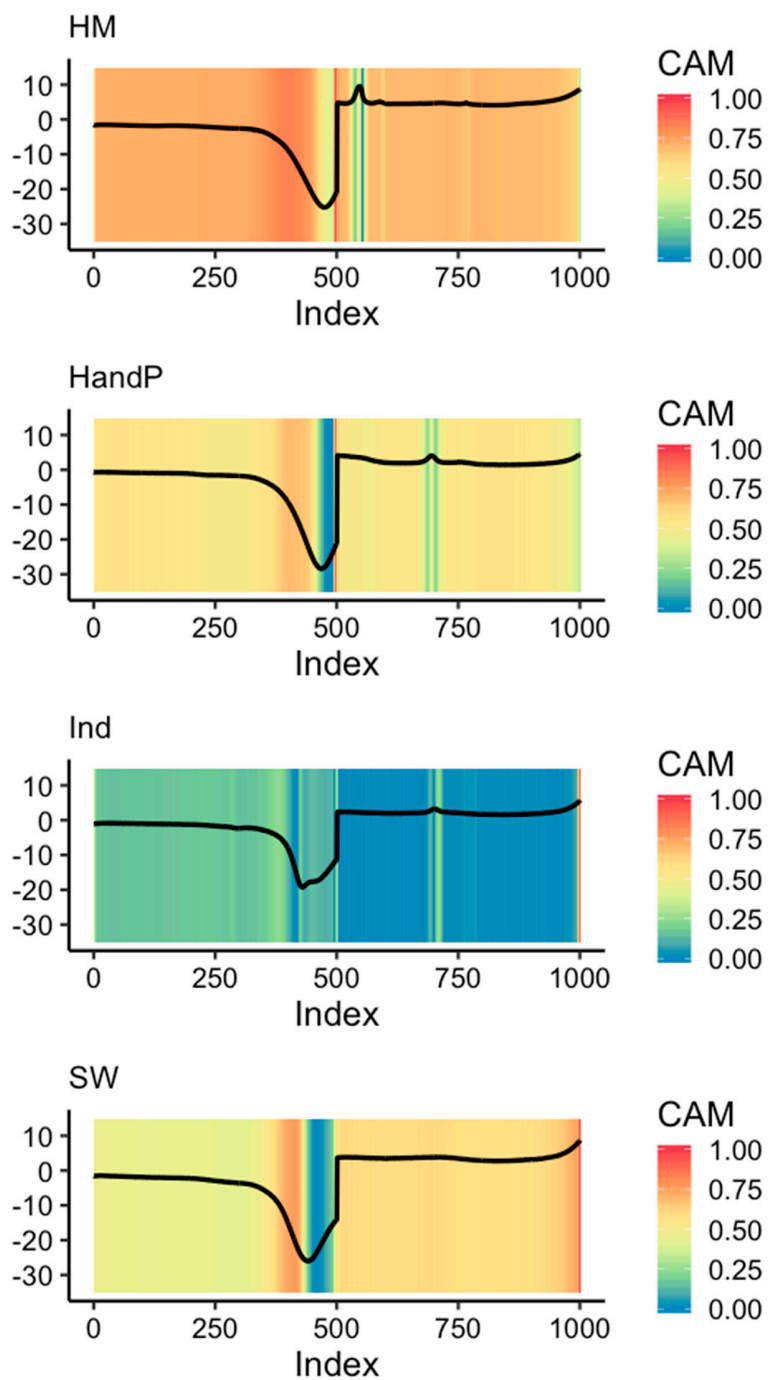

**Figure S5.** Representative CAMs of each class in SW-4. Label definitions: Heavy metals (HM), phenols / industrial compounds (Ind), pesticides and herbicides (HandP), and seawater with no chemicals added (SW).

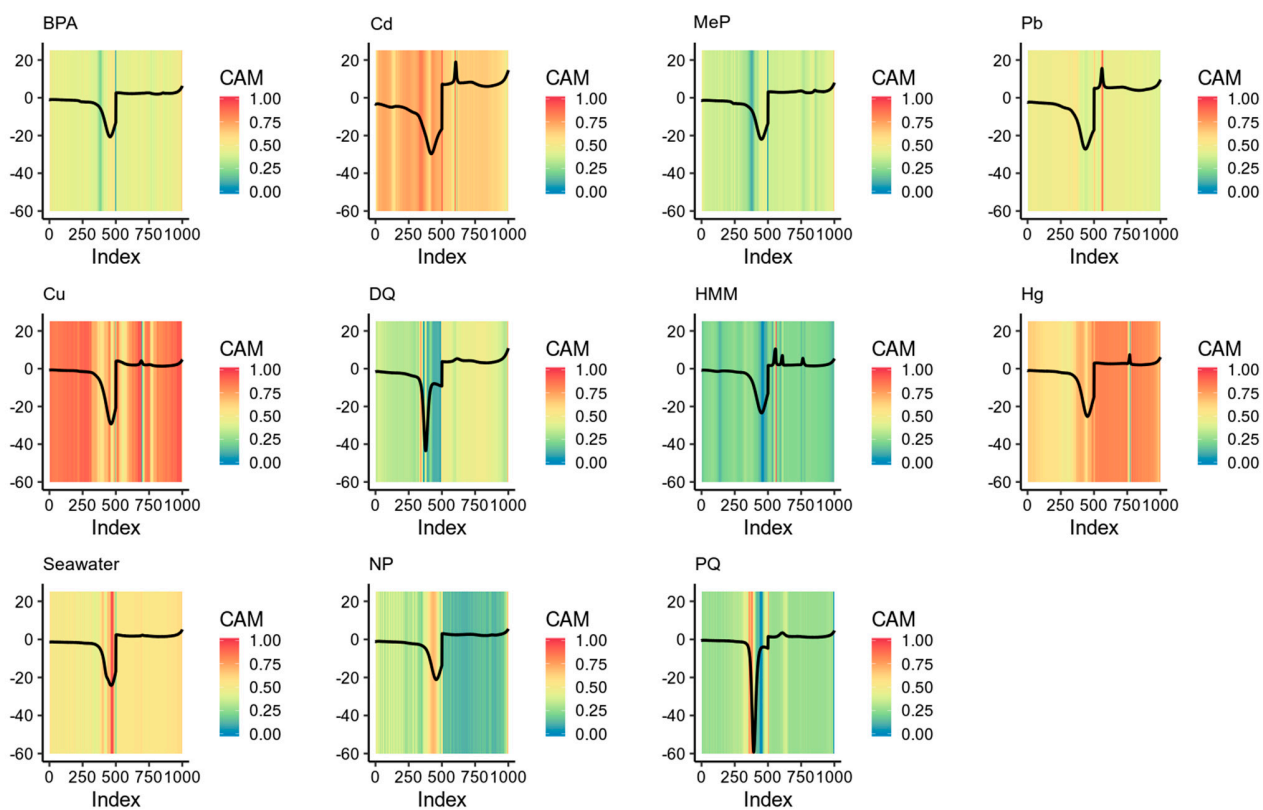

**Figure S6.** Representative CAMs of each class in SW-11. Label definitions:  $\text{CuSO}_4$  (Cu),  $\text{PbCl}_2$  (Pb),  $\text{HgCl}_2$  (Hg) and  $\text{CdCl}_2$  (Cd), paraquat (PQ) and diquat (DQ), methyl parathion (MeP), Bisphenol-A (BPA), nonyl phenol (NP), and HMM (heavy metal mixture of Cd, Hg and Pb).

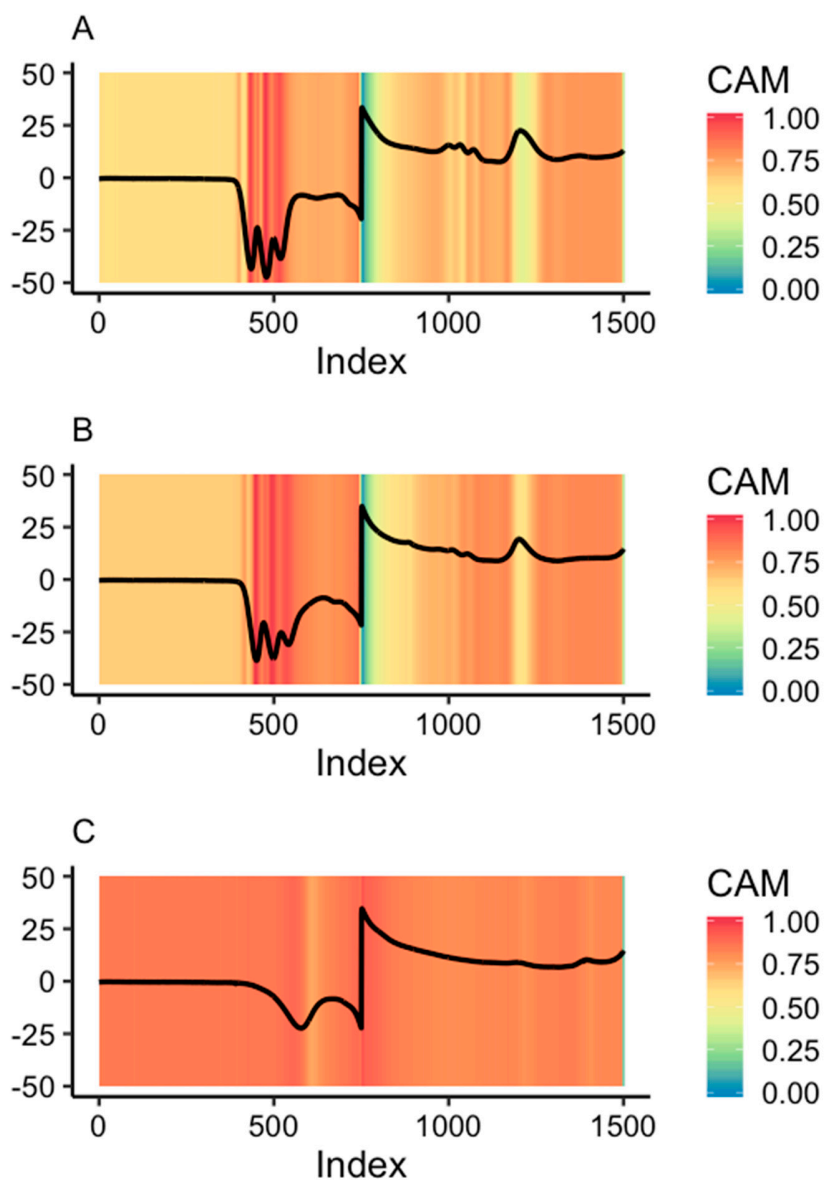

**Figure S7.** Representative CAMs of each class in EXP-3. Label definitions: class A containing TNT, TNB, Tetryl, 2,6-DNT, 2,4-DNT, and 1,3-DNB; class B containing 4-am, 2-am, 3-NT, and RDX; class C containing buffer alone.



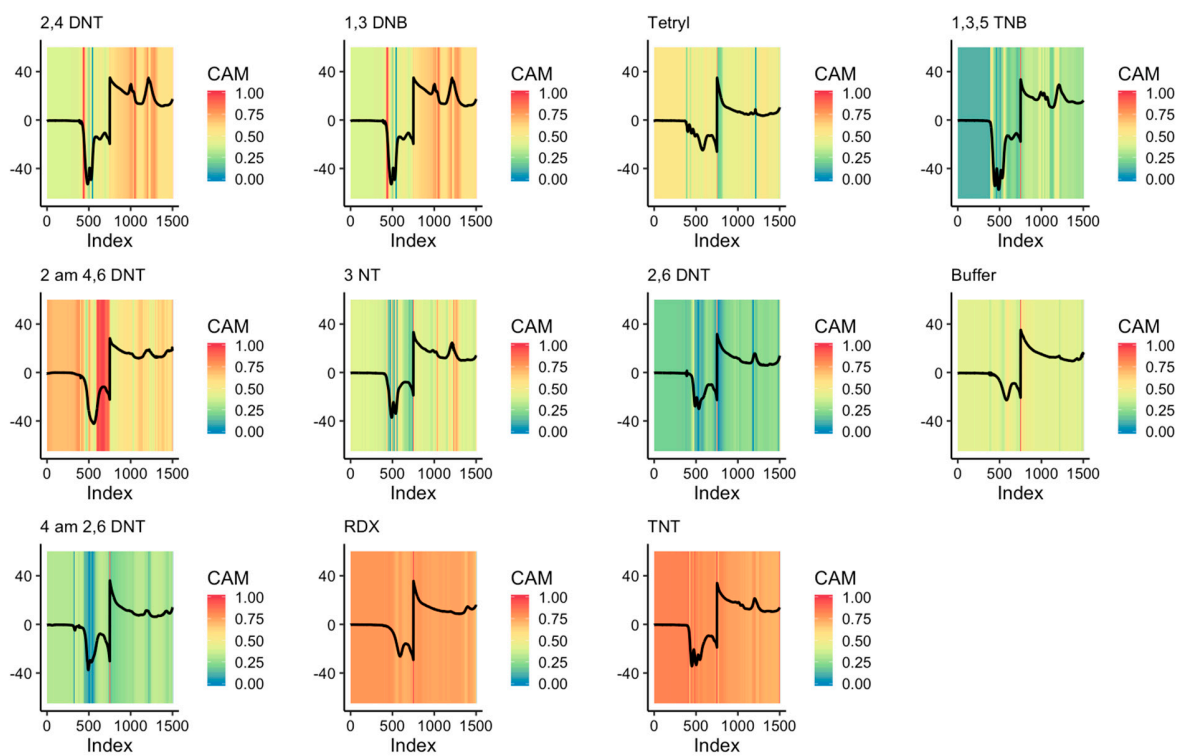

**Figure S8.** Representative CAMs of each class in EXP-11. Explosive library set previously reported.<sup>8</sup>

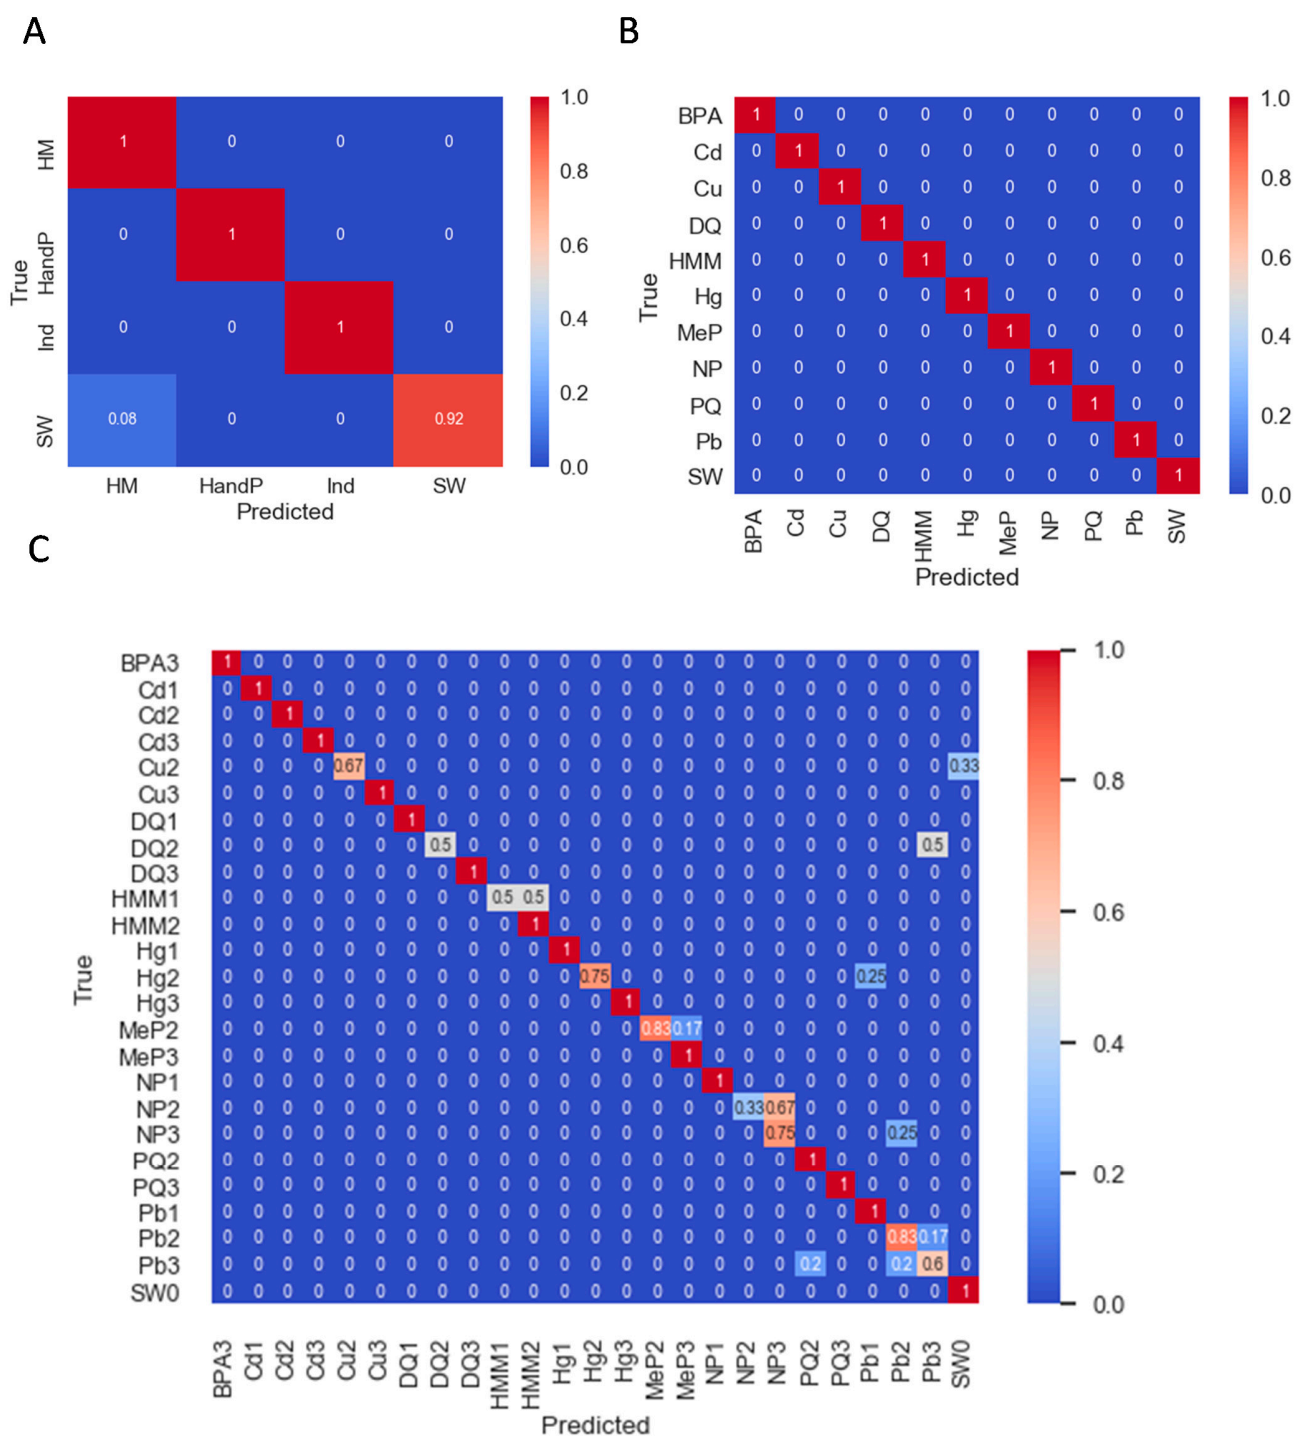

**Figure S9.** Confusion matrix for (A) 4-SW, (B) 11-SW, and (C) 11 SW dataset when separated by concentration range (25 classes total), using the best LSTM-FCN or ALSTM-FCN models. Label definitions: Figure S9A. Heavy metals (HM), phenols / industrial compounds (Ind), pesticides and herbicides (HandP), and seawater with no chemicals added (SW); Figure S9B. CuSO<sub>4</sub> (Cu), PbCl<sub>2</sub> (Pb), HgCl<sub>2</sub> (Hg) and CdCl<sub>2</sub> (Cd), paraquat (PQ) and diquat (DQ), methyl parathion (MeP), Bisphenol-A (BPA), nonyl phenol (NP), and HMM (heavy metal mixture of Cd, Hg and Pb). Figure S9C. Similar labels but with 1, 2 or 3 corresponding to concentration ranges: 1 < 100 ppb, 2 = 100 – 750 ppb and 3 > 750 ppb.
